# Supplementary material for: Polyamine-assisted hydrothermal synthesis of bimetallic Pd1Cu3 multipods and their high catalytic ability in 4-nitrophenol reduction
Source: Royal Society of Chemistry journal article supplement (doi:10.1039/c4ra11808a), 2014-01-01
Supplement: c4ra11808a1.pdf [file c4ra11808a1.pdf]

# **Polyamine-assisted hydrothermal synthesis of bimetallic Pd<sub>1</sub>Cu<sub>3</sub> multipods and their high catalytic ability in 4-nitrophenol reduction**

Xiaoyu Qiu,<sup>‡</sup> Ruopeng Zhao,<sup>‡</sup> Yanan Li, Yawen Tang,<sup>\*</sup> Dongmei Sun, Shaohua Wei,<sup>\*</sup> and Tianhong Lu

*Jiangsu Key Laboratory of New Power Batteries, Jiangsu Collaborative Innovation Center of Biomedical Functional Materials, School of Chemistry and Materials Science, Nanjing Normal University, Nanjing 210023, China*

<sup>‡</sup> *Both authors contributed equally to this work*

## Experimental Details

**Reagents and chemicals:** Polyallylamine hydrochloride (PAH, weight-average molecular weight 15 0000) was supplied from Nitto Boseki Co., Ltd. (Tokyo, Japan). Palladium chloride ( $\text{PdCl}_2$ ), cupric chloride ( $\text{CuCl}_2$ ), formaldehyde solution (HCHO, 40%), 4-nitrophenol (4-NP), and sodium borohydride ( $\text{NaBH}_4$ ) were purchased from Sinopharm Chemical Reagent Co., Ltd. (Shanghai, China). Commercial Pd black was purchased from Johnson Matthey Corporation. Other reagents were of analytical reagent grade and used without further purification.

**Synthesis of  $\text{Pd}_1\text{Cu}_3$ -MNCs:** In a typical synthesis, 0.33 mL of 50 mM  $\text{PdCl}_2$ , 1.0 mL of 50 mM  $\text{CuCl}_2$ , and 1.74 mL of 0.43 M PAH (molarity of PAH given with respect to the repeating unit) aqueous solutions were added to 6.0 mL water with continued stirring. After adjusting solution pH to 10.0, 0.5 mL of HCHO solution (40%) was added into the mixture solution and mechanically stirred for 10 min. Then, the mixture solution was transferred to a 20-mL Teflon-lined stainless-steel autoclave, and was then heated at 120 °C for 4 h. After being cooled to room temperature, the obtained  $\text{Pd}_1\text{Cu}_3$ -MNCs were separated by centrifugation at 15000 rpm for 15 min, washed several times with water, and then dried at 60 °C for 5 h in a vacuum dryer.

**Electrochemical measurement:** All electrochemical experiments were performed on a CHI 660 C electrochemical analyzer (CH Instruments, Shanghai, Chenghua Co., Ltd.) at  $30 \pm 1$  °C. A standard three-electrode system was used, which consisted of a platinum wire as the auxiliary electrode, a saturated calomel reference electrode (SCE), and a glassy carbon electrode as the working electrode.

**Catalytic reduction of 4-nitrophenol (4-NP):** Typically, 1.0 mL of 0.1 M  $\text{NaBH}_4$  and 2 mL of  $1.0 \times 10^{-5}$  M 4-NP solutions were first put in a quartz cuvette having 1-cm path length. Then, 40  $\mu\text{L}$  of  $\text{Pd}_1\text{Cu}_3$ -MNCs aqueous solution ( $1.0 \text{ g L}^{-1}$ ) was added into the mixture solution. The reduction progress of 4-NP was then monitored by recording the time-dependent absorption UV-vis spectra of the reaction solution at a regular time interval of 3 min. For comparison, commercial Pd black was also used as heterogeneous catalyst for the reduction of 4-NP under same experimental conditions

(40  $\mu\text{L}$  of 1.0 g  $\text{L}^{-1}$  Pd black aqueous solution).

**Physical characterization:** Transmission electron microscopy (TEM) measurements were made on a JEOL JEM-2100F transmission electron microscopy operated at an accelerating voltage of 200 kV. The composition of products was determined using the energy dispersive spectrum (EDX) techniques. X-ray diffraction (XRD) patterns of nanocrystals were obtained with Model D/max-rC X-ray diffractometer using Cu Ka radiation source ( $\lambda=1.5406 \text{ \AA}$ ) and operating at 40 kV and 100 mA. X-ray photoelectron spectroscopy (XPS) measurements were performed with a Thermo VG Scientific ESCALAB 250 spectrometer with a monochromatic Al Ka X-ray source (1486.6 eV photons). The binding energy was calibrated by means of the C1s peak energy of 284.6 eV. Ultraviolet-visible spectroscopy (UV-vis) measurements were performed on a Shimadzu UV3600 spectrophotometer at room temperature.

## Figures

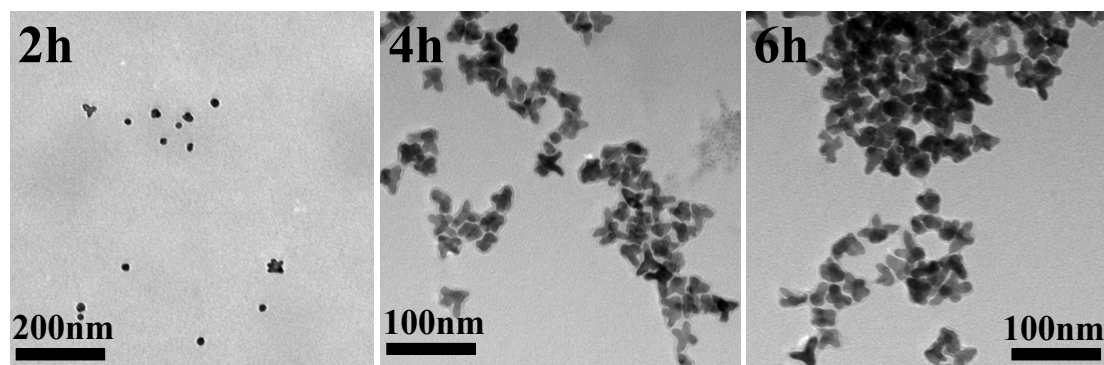

**Fig. S1.** TEM images of the Pd<sub>1</sub>Cu<sub>3</sub>-MNCs samples collected at 2, 4 and 6 h. TEM images show like-spheres Pd<sub>1</sub>Cu<sub>3</sub> nanocrystals evolve into Pd<sub>1</sub>Cu<sub>3</sub>-MNCs at 4 h. And, the shape of Pd<sub>1</sub>Cu<sub>3</sub>-MNCs remains unchanged after 4 h.

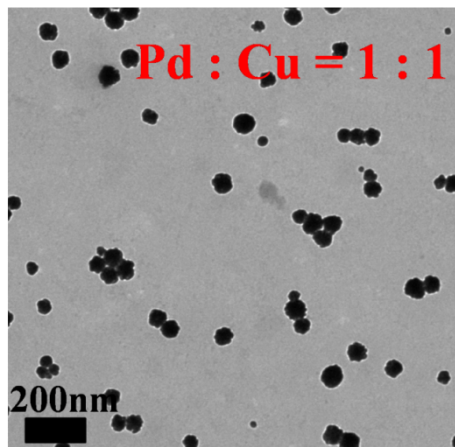

**Fig. S2.** TEM image of the Pd<sub>1</sub>Cu<sub>1</sub> nanoflowers.

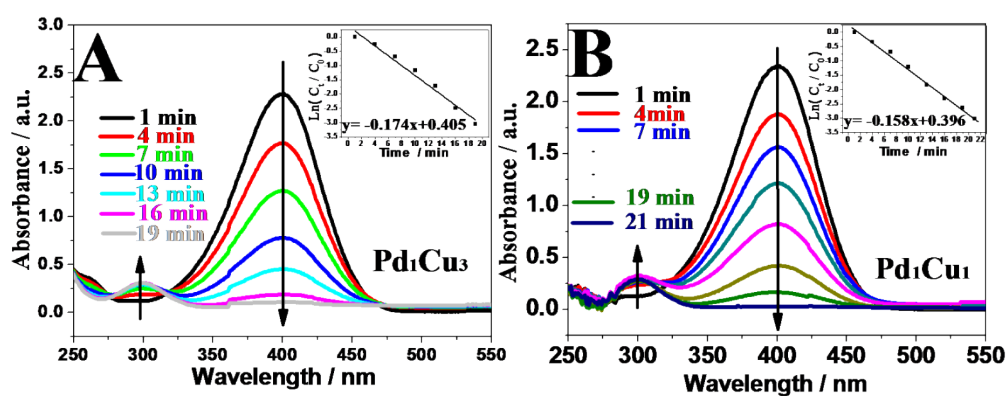

**Fig. S3.** UV-vis spectra for successive reduction of 4-NP with  $\text{NaBH}_4$  using (A)  $\text{Pd}_1\text{Cu}_3$ -MNCs and (B)  $\text{Pd}_1\text{Cu}_1$  nanoflowers as catalysts at 3 min intervals. Inserts in A-B: the relationship between  $\ln(C_t/C_0)$  and reaction time ( $t$ ), where in the ratio of the 4-NP concentration ( $C_t$  at time  $t$ ) to its initial value  $C_0$  were directly given by the relative intensity of the respective absorbance  $A_t/A_0$ .
